# Supplementary material for: Effect of Fly Maggot Protein as Dietary on Growth and Intestinal Microbial Community of Pacific White Shrimp Litopenaeus vannamei
Source: MDPI journal article supplement (doi:10.3390/biology12111433), 2023-11-15
Supplement: s1 [file s1]

**Table S1.** Feed formulation for each group. (A) Feed composition of the CK group;(B) Feed composition of the FM group; (C) Feed composition of the FF group; (D) Feed composition of the HT group, unit: %

| feed ingredients                      | CK   |
|---------------------------------------|------|
| fishmeal                              | 30   |
| soybean meal (processed GMO soybeans) | 23   |
| peanut bran                           | 15   |
| yeast                                 | 5    |
| flour                                 | 20.3 |
| soy lecithin                          | 1    |
| fish oil                              | 1    |
| soybean oil                           | 1    |
| choline chloride                      | 0.6  |
| potassium dihydrogen phosphate        | 1    |
| multivitamin                          | 1    |
| multimineral                          | 1    |
| Vc Phosphatidic Acid                  | 0.1  |

(A)

| feed ingredients                      | FM   |
|---------------------------------------|------|
| fly maggot protein                    | 30   |
| soybean meal (processed GMO soybeans) | 23   |
| peanut bran                           | 15   |
| yeast                                 | 5    |
| flour                                 | 20.3 |
| soy lecithin                          | 1    |
| fish oil                              | 1    |
| soybean oil                           | 1    |
| choline chloride                      | 0.6  |
| potassium dihydrogen phosphate        | 1    |
| multivitamin                          | 1    |
| multimineral                          | 1    |
| Vc Phosphatidic Acid                  | 0.1  |

(B)

| feed ingredients                      | FF   |
|---------------------------------------|------|
| fly maggot protein                    | 30   |
| soybean meal (processed GMO soybeans) | 23   |
| peanut bran                           | 15   |
| yeast                                 | 5    |
| flour                                 | 20.3 |
| soy lecithin                          | 1    |
| fish oil                              | 1    |
| soybean oil                           | 1    |
| choline chloride                      | 0.6  |
| potassium dihydrogen phosphate        | 1    |
| multivitamin                          | 1    |
| multimineral                          | 1    |
| Vc Phosphatidic Acid                  | 0.1  |

(C)

| feed ingredients                      | HT   |
|---------------------------------------|------|
| fly maggot protein                    | 30   |
| soybean meal (processed GMO soybeans) | 23   |
| peanut bran                           | 15   |
| yeast                                 | 5    |
| flour                                 | 20.3 |
| soy lecithin                          | 1    |
| fish oil                              | 1    |
| soybean oil                           | 1    |
| choline chloride                      | 0.6  |
| potassium dihydrogen phosphate        | 1    |
| multivitamin                          | 1    |
| multimineral                          | 1    |
| Vc Phosphatidic Acid                  | 0.1  |

(D)

**Table S2.** Amino acid composition of each feed group, unit: %

| Amino acid type | CK   | FM   | FM   | HT   |
|-----------------|------|------|------|------|
| Asp             | 3.79 | 5.30 | 5.69 | 5.50 |
| Thr             | 1.57 | 2.18 | 2.78 | 1.97 |
| Ser             | 1.42 | 5.08 | 4.99 | 5.32 |
| Glu             | 5.79 | 6.79 | 6.59 | 6.35 |
| Gly             | 1.75 | 3.77 | 3.39 | 3.30 |
| Ala             | 2.20 | 1.86 | 1.69 | 1.73 |
| Cys             | 0.32 | 1.79 | 1.77 | 1.76 |
| Val             | 1.85 | 2.69 | 2.66 | 2.32 |
| Met             | 0.51 | 0.91 | 0.87 | 0.97 |
| Ile             | 1.72 | 2.88 | 2.90 | 2.85 |
| Leu             | 3.00 | 3.28 | 3.14 | 3.19 |
| Tyr             | 1.36 | 2.57 | 2.61 | 2.58 |
| Phe             | 1.58 | 2.60 | 2.51 | 2.70 |
| Lys             | 2.70 | 3.87 | 3.79 | 3.76 |
| His             | 1.07 | 1.56 | 1.78 | 1.50 |
| Arg             | 2.24 | 3.49 | 3.76 | 3.56 |
| Pro             | 1.23 | 4.58 | 4.36 | 4.74 |

Note: Tryptophan was not measured.

**Table S3.** Nutritional composition of groups of feed, unit: %

| Nutrient composition | CK   | FM   | FM   | HT   |
|----------------------|------|------|------|------|
| Crude protein        | 30.0 | 31.6 | 30.5 | 31.0 |
| Crude Fiber          | 5.0  | 9.9  | 10.3 | 10.6 |
| Calcium              | 4.0  | 3.9  | 3.9  | 4.1  |
| Phosphorus           | 1.6  | 2.1  | 2.0  | 2.0  |
| Crude Ash            | 16.0 | 10.5 | 10.4 | 10.1 |
| Water                | 12.0 | 40.0 | 35.0 | 10.0 |
